# Supplementary material
Source: Springer Nature journal article supplement (https://www.springermedizin.de/resource/supplementary/12875_2010_553_MOESM1_ESM.pdf/9434924)
Supplement: MOESM1 [file 9434924]

1. What is your understanding of men's health?
2. What does men's health screening mean to you?
3. What is your opinion about men's health screening?
  - a. Is it necessary? Would you like to elaborate on your answer?
  - b. Who would be appropriate to perform health screening in men? Any reasons for your answer?
  - c. What is the role of primary care physicians?
  - d. How should men's health screening be carried out?
4. What are your practices in health screening for men?
5. What are the barriers and motivators you faced when offering health screening to men?
